# Supplementary material
Source: Springer Nature journal article supplement (https://www.springermedizin.de/resource/supplementary/13013_2010_324_MOESM8_ESM.pdf/9631630)

# derotating blade biomechanics

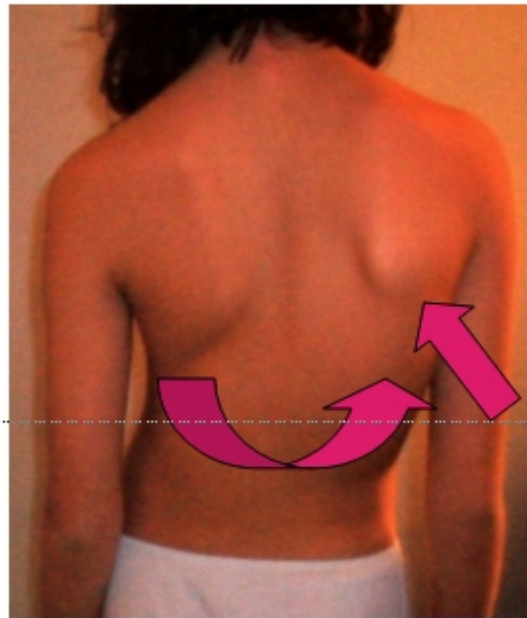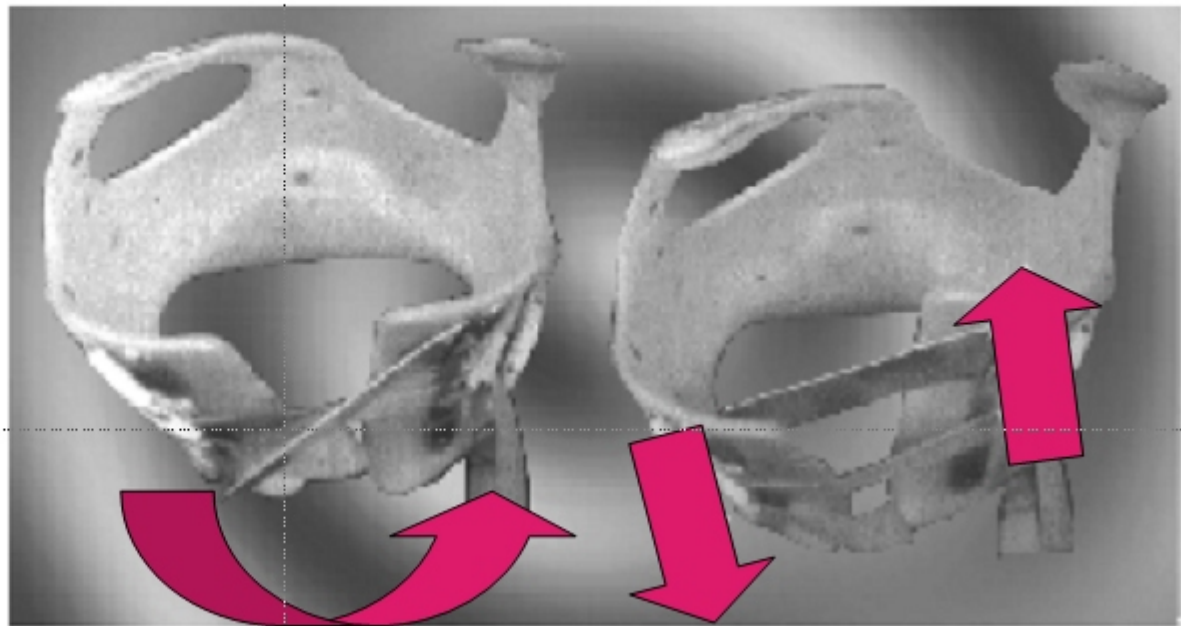

Supplement: MOESM8 [file 9631630]
